# Supplementary material for: The Hippo kinase LATS2 impairs pancreatic β-cell survival in diabetes through the mTORC1-autophagy axis
Source: PubMed Central journal article supplement (PMC8363615; doi:10.1038/s41467-021-25145-x), 2021-08-13
Supplement: 41467_2021_25145_MOESM1_ESM.pdf [file 41467_2021_25145_MOESM1_ESM.pdf]

**Supplementary Information**

**The Hippo kinase LATS2 impairs pancreatic  $\beta$ -cell survival in diabetes  
through the mTORC1-autophagy axis**

**Ting Yuan, Karthika Annamalai, *et al.***

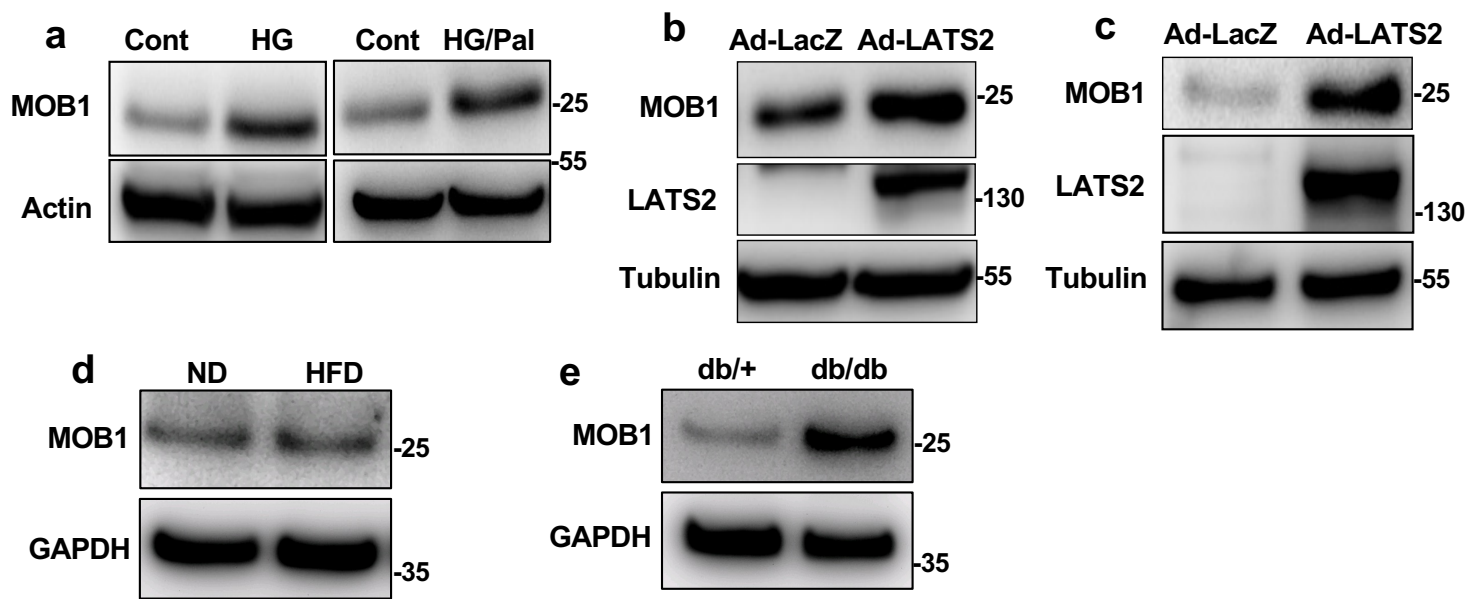

**Supplementary Figure 1. MOB1 is upregulated by diabetogenic conditions and LATS2.** Representative Western blots (a) of INS-1E cells treated with 22.2 mM glucose (HG) alone or with 0.5 mM palmitate (HG/Pal) for 48h, (b,c) of INS-1E cells (b) and human islets (c) transduced with LacZ control or LATS2 adenoviruses for 48 h, (d,e) of isolated islets from (d) HFD-treated C57BL/6J mice for 16 weeks or (e) from obese diabetic leptin receptor-deficient db/db mice and their corresponding controls cultured overnight and transfected with the N-luc-YAP15-S127 plasmid for 24 hours. GAPDH blots in d,e are from same experiment of Figure 1f,g, respectively. a,c-e: n=3 independent experiments; b: n=3 different human islets isolations.

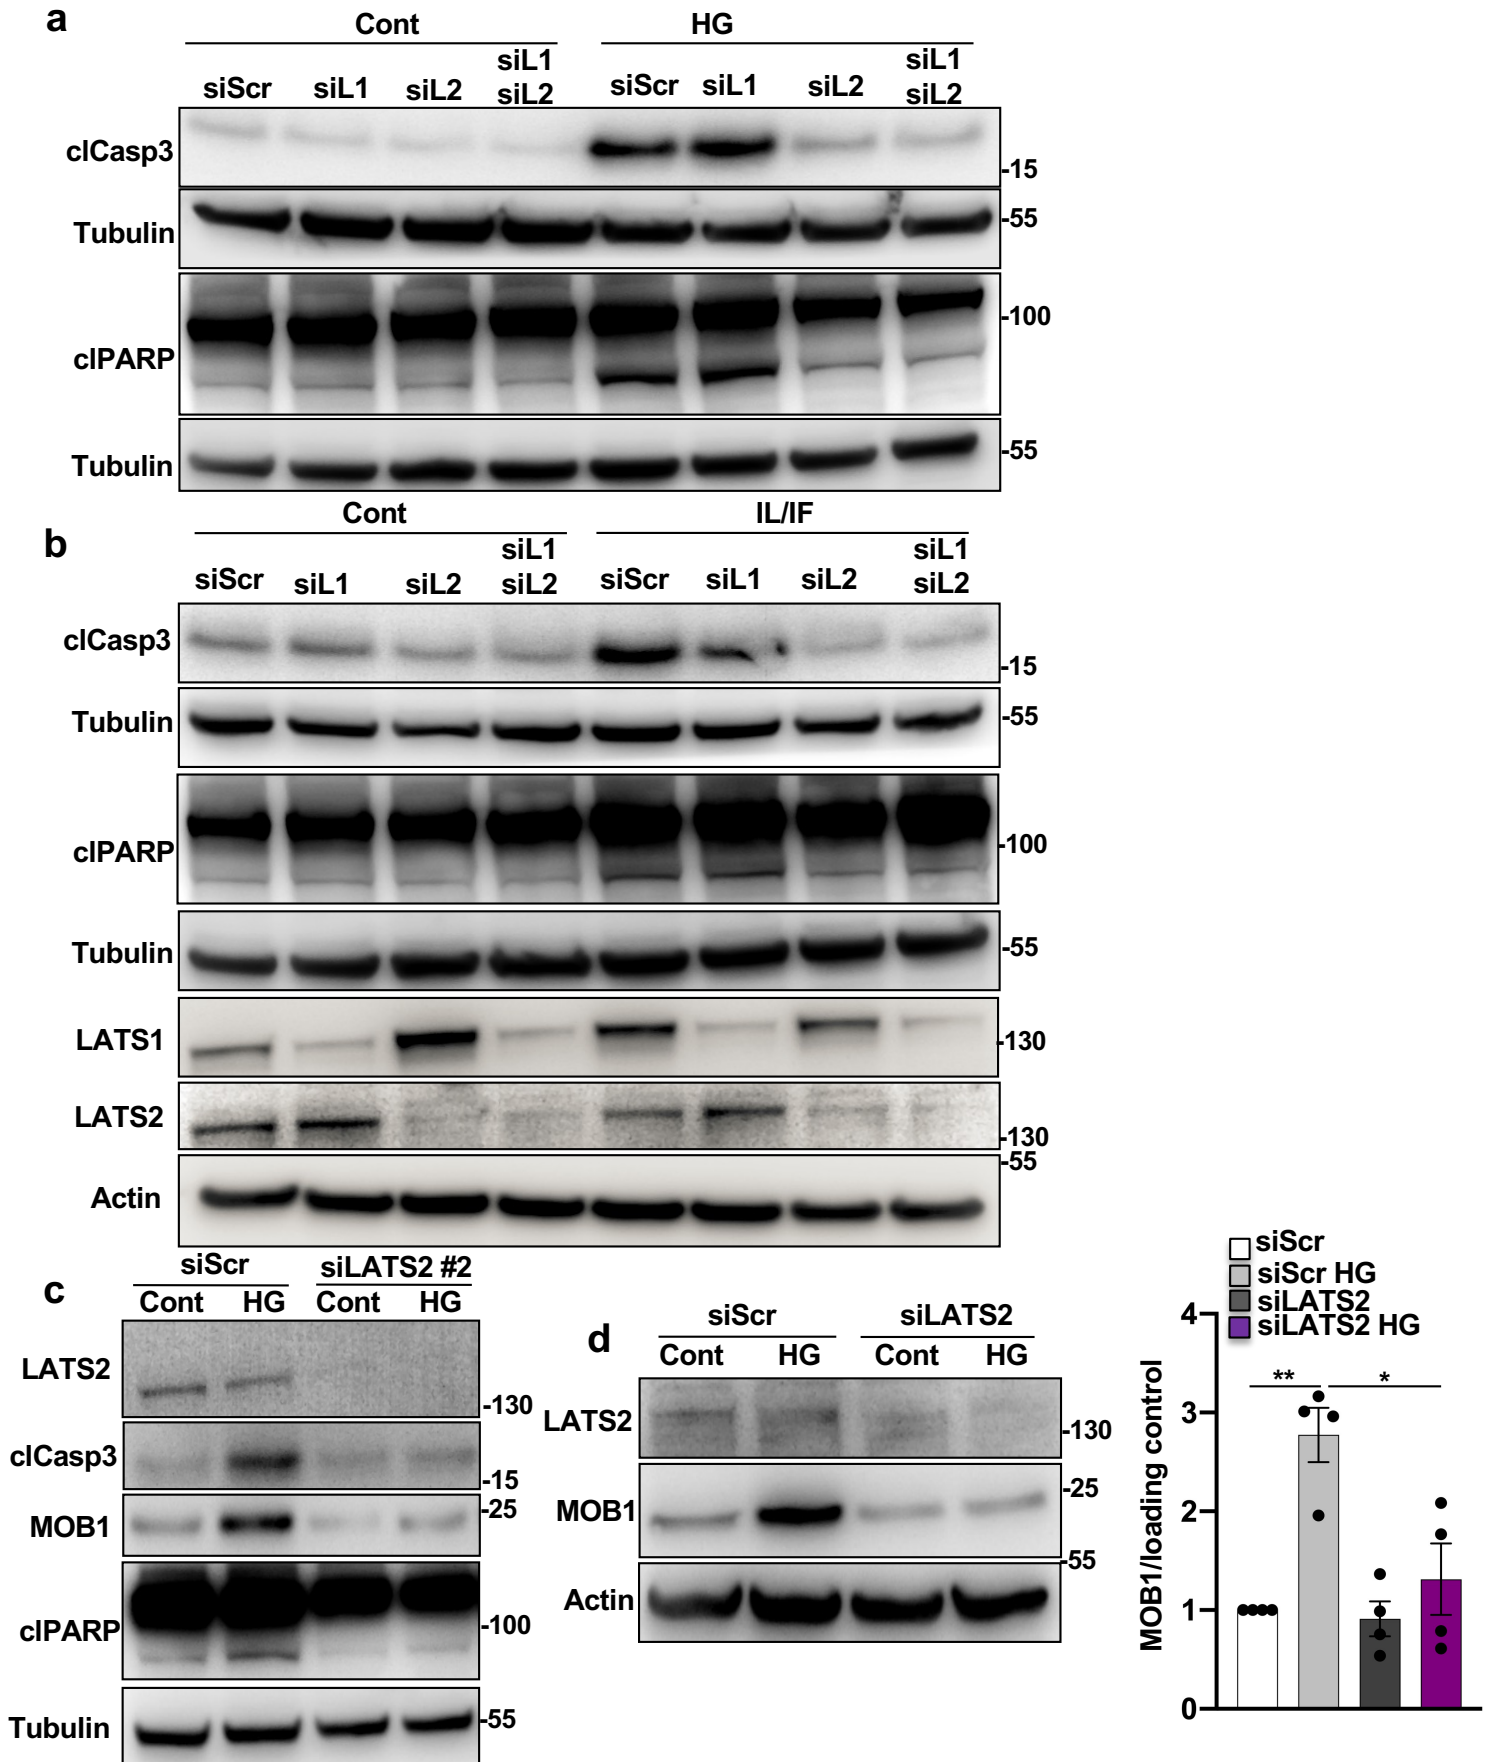

**Supplementary Figure 2. LATS2 but not LATS1 knockdown protects from  $\beta$ -cell apoptosis.** (a,b) Representative Western blots of INS-1E cells transfected with LATS1 and/or LATS2 siRNA or control siScr and treated with (a) 22.2 mM glucose (HG) or (b) 2 ng/mL IL1 $\beta$  plus 1000U/mL IFN $\gamma$  (IL/IF) for 48 h, (c) of INS-1E cells transfected with LATS2 siRNA (second pool #2) or control siScr and treated with the 22.2 mM glucose (HG) for 48 h (a-c: n=1 experiment), (d) of INS-1E cells transfected with LATS2 siRNA or control siScr and treated with 22.2 mM glucose (HG) for 48 h with the respective pooled quantitative densitometry analysis (right panel; n=4 independent experiments). Data are expressed as means  $\pm$  SEM. \* $p$ <0.05, \*\* $p$ <0.001; by two-tailed Student's  $t$ -test.

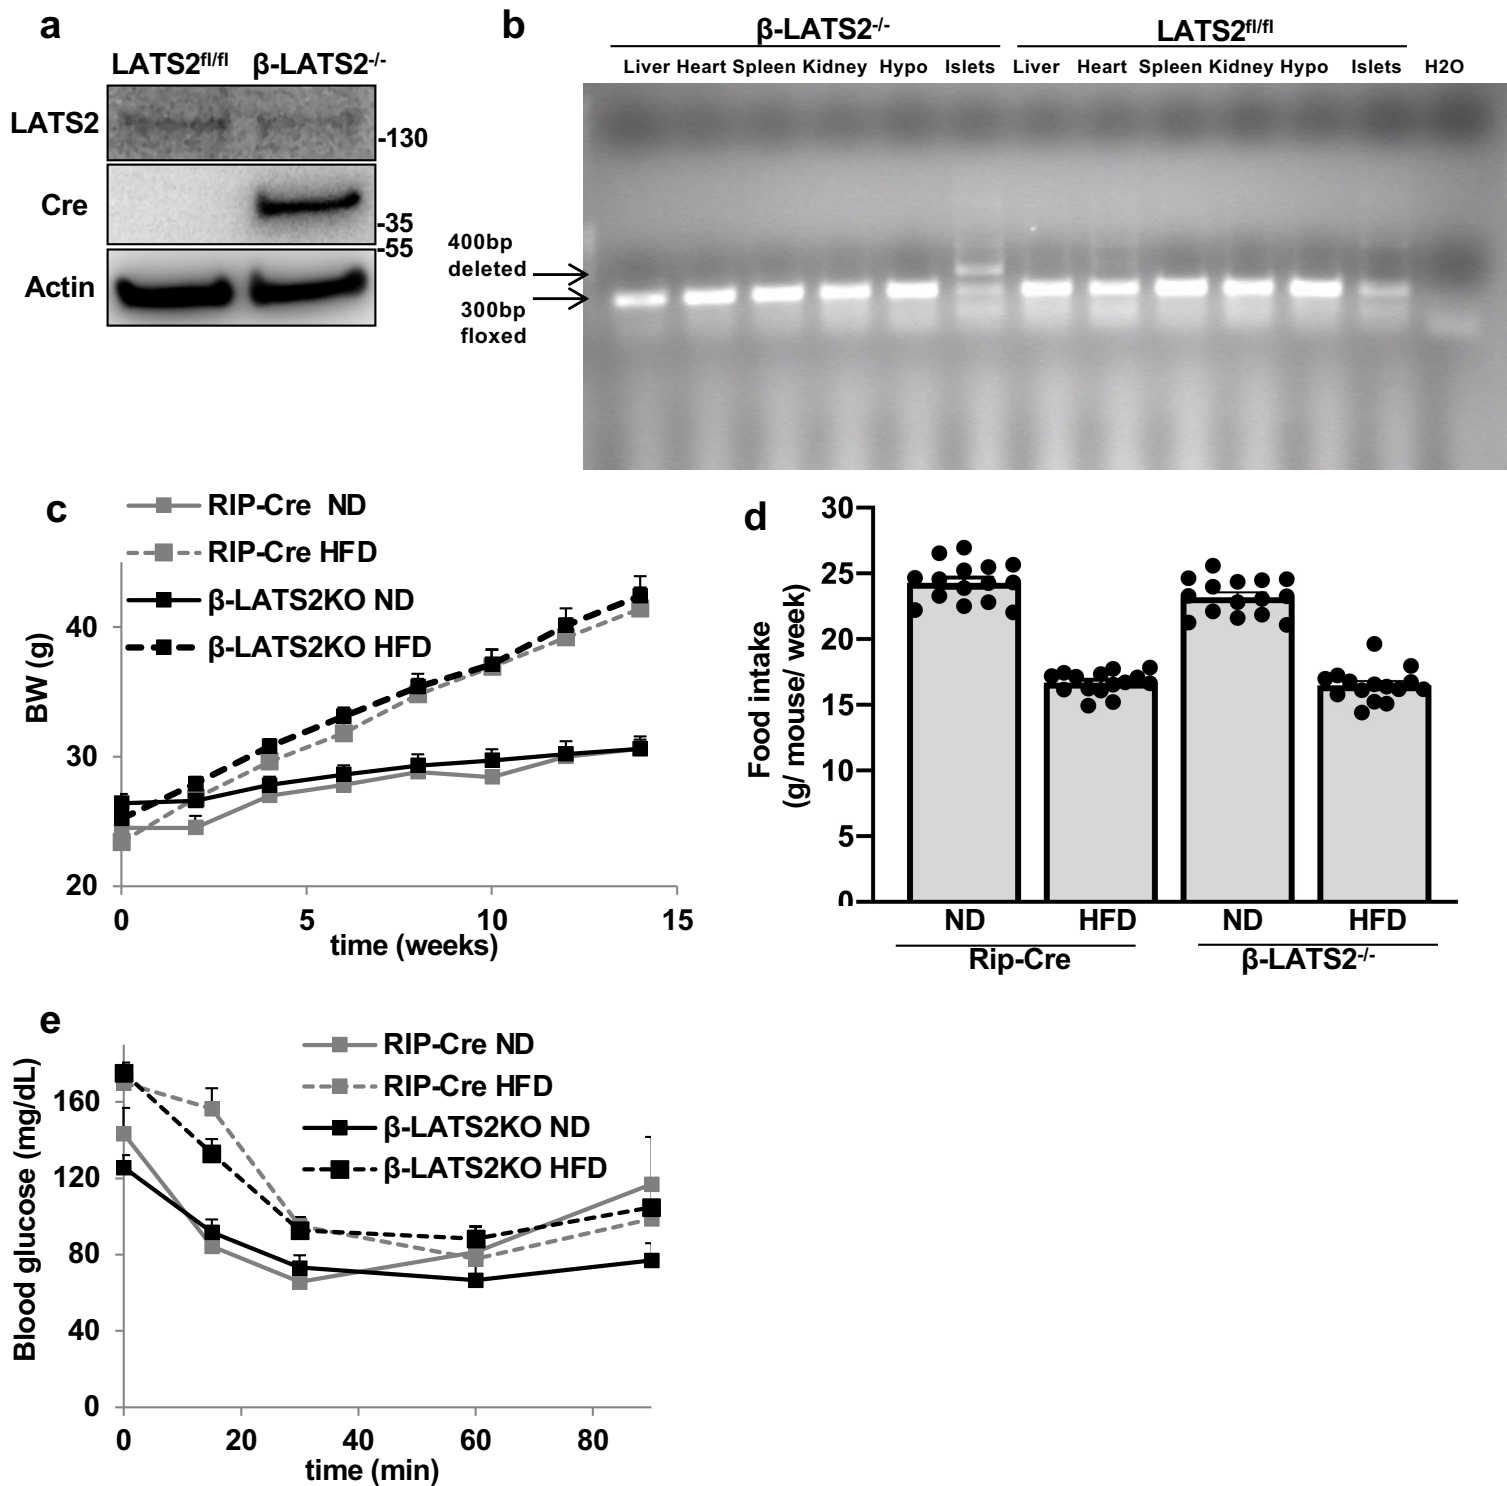

**Supplementary Figure 3. Characterization of  $\beta$ -cell specific LATS2 knockout mice ( $\beta$ -LATS2<sup>-/-</sup>).**

(a) Representative Western blot analysis of protein lysates from islets of  $\beta$ -LATS2<sup>-/-</sup> and LATS2<sup>fl/fl</sup> control mice (n=3 independent experiments). (b) PCR analysis of Cre-mediated LATS2 gene deletion in genomic DNA isolated from liver, heart, spleen, kidney, hypothalamus and pancreatic islets of  $\beta$ -LATS2<sup>-/-</sup> and LATS2<sup>fl/fl</sup> control mice (n=3 mice/group). (c-e)  $\beta$ -LATS2<sup>-/-</sup> and Rip-Cre control mice were fed a normal (ND) or high fat/ high sucrose diet ("Surwit"; HFD) for 17 weeks. (c) Body weight is expressed as means  $\pm$  SEM from Rip-Cre ND n=8; Rip-Cre HFD n=19;  $\beta$ -LATS2<sup>-/-</sup> ND n=10;  $\beta$ -LATS2<sup>-/-</sup> HFD n=16 mice. (d) Average weekly food intake/mouse (average of n=15 weeks). (e) Intraperitoneal insulin tolerance test (ipITT) with 0.75IU/kg BW insulin. Data are expressed as means  $\pm$  SEM from Rip-Cre ND n=7; Rip-Cre HFD n=17;  $\beta$ -LATS2<sup>-/-</sup> ND n=10;  $\beta$ -LATS2<sup>-/-</sup> HFD n=13 mice.



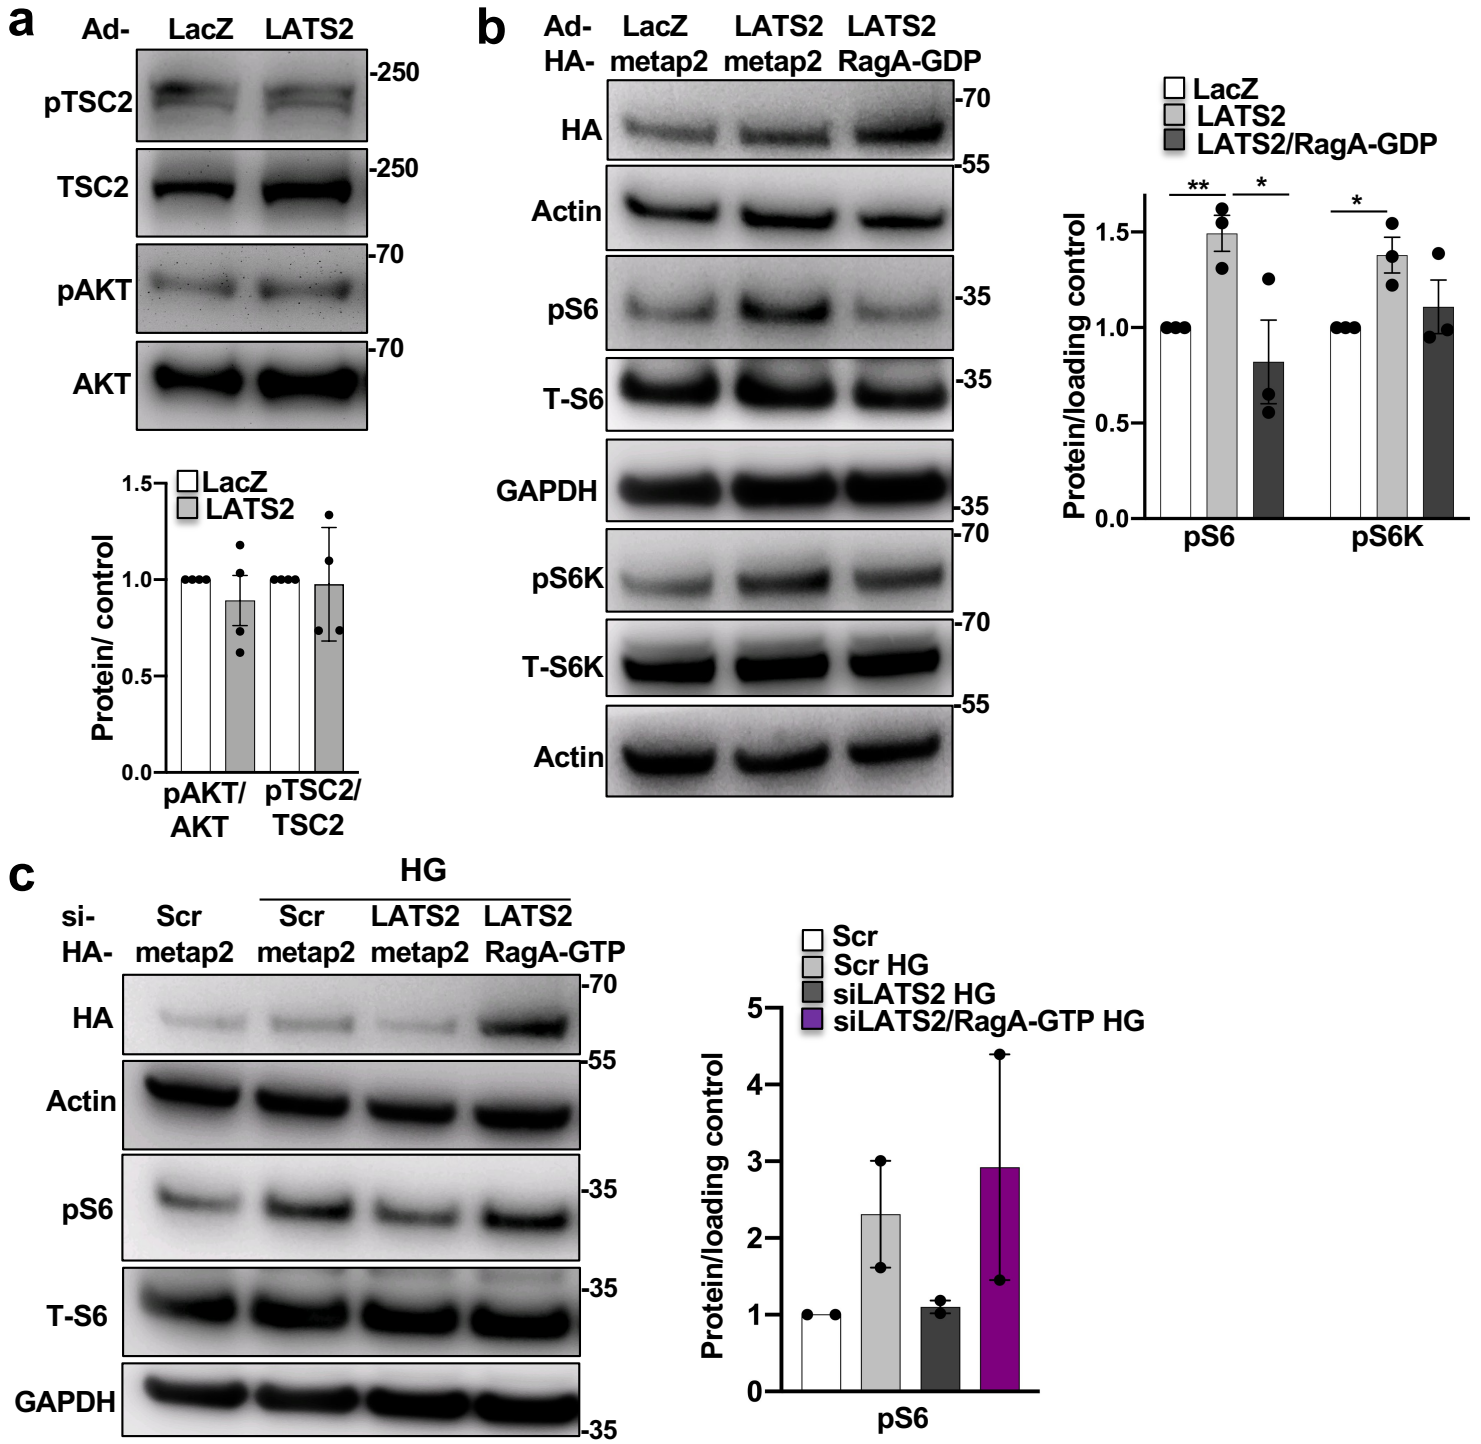

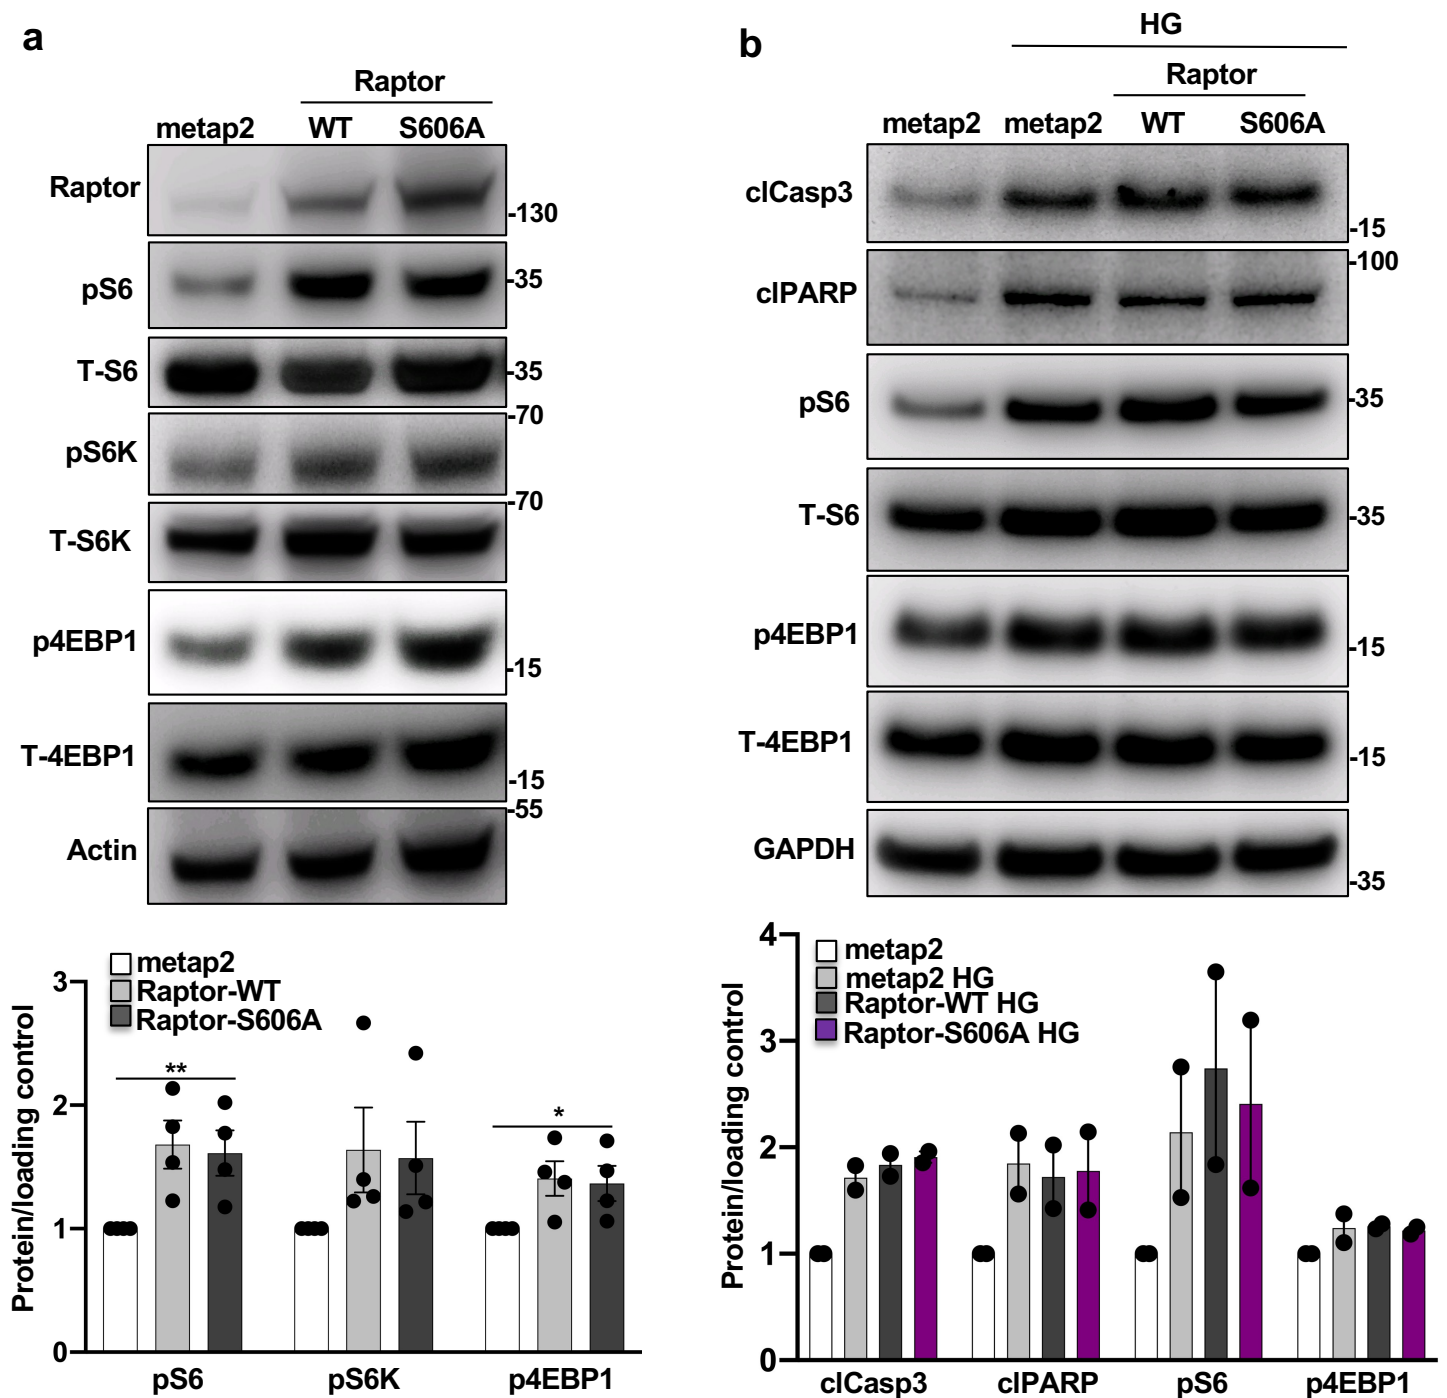

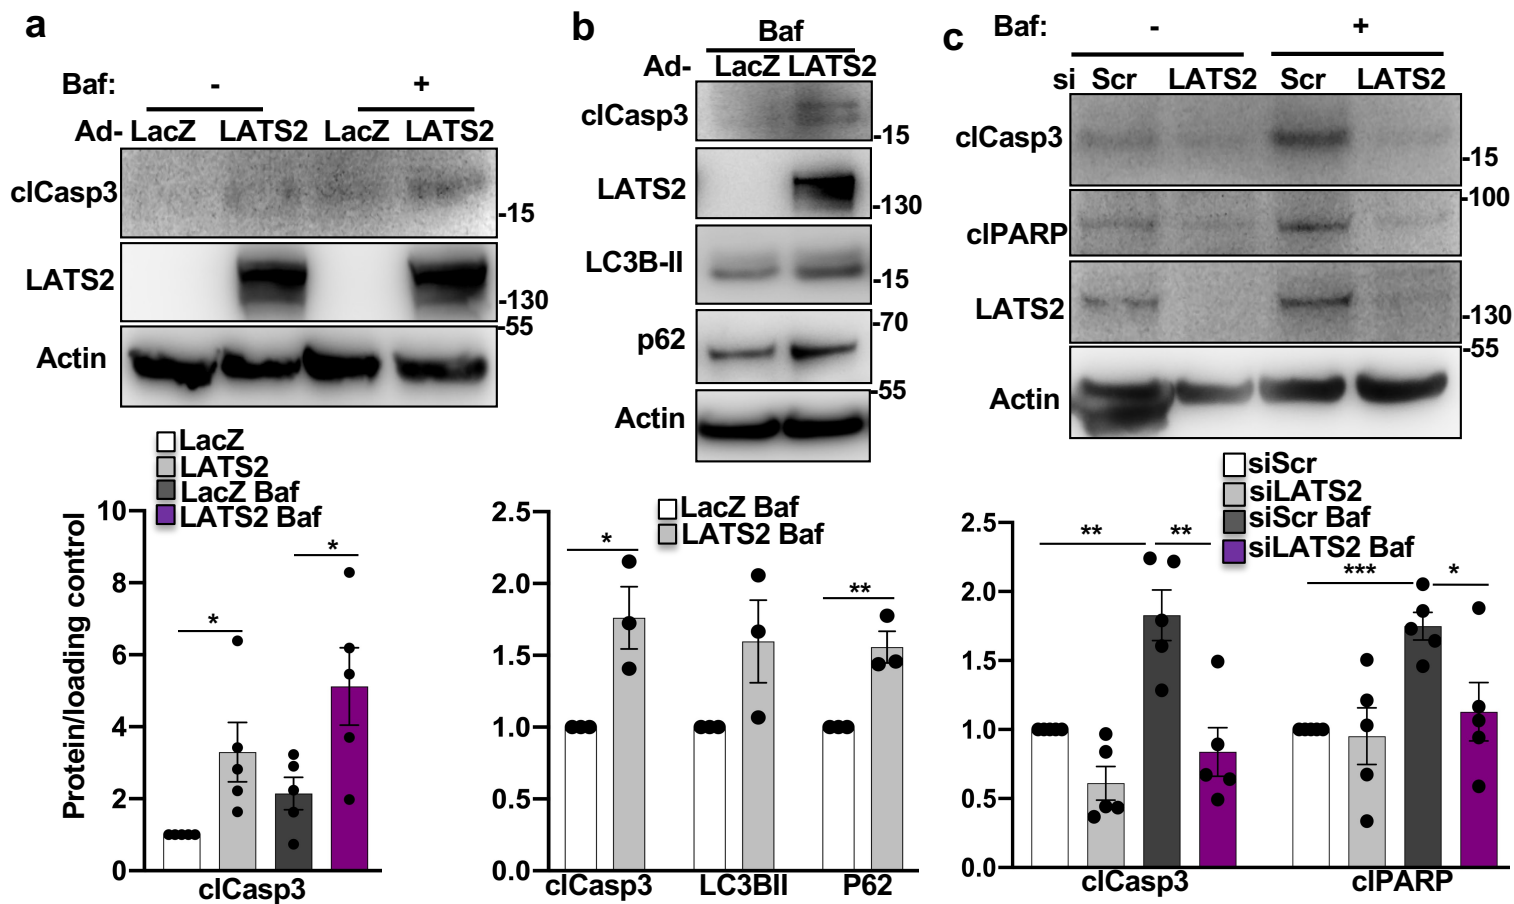

**Supplementary Figure 6. LATS2-autophagy crosstalk.** Representative Western blots and pooled quantitative densitometry analysis (lower panels) of INS-1E cells **(a)** and human islets **(b)** transduced with LacZ control or LATS2 adenoviruses and then treated with 20 nM Bafilomycin A1 (Baf) for 4h (n=5,3 independent experiments respectively for INS-1E and human islets), **(c)** of INS-1E cells transfected with siLATS2 or siScr and then treated with Bafilomycin A1 (n=5 independent experiments). Data are expressed as means  $\pm$  SEM. \* $p < 0.05$ , \*\* $p < 0.01$ , \*\*\* $p < 0.001$ ; by two-tailed Student's *t*-test.

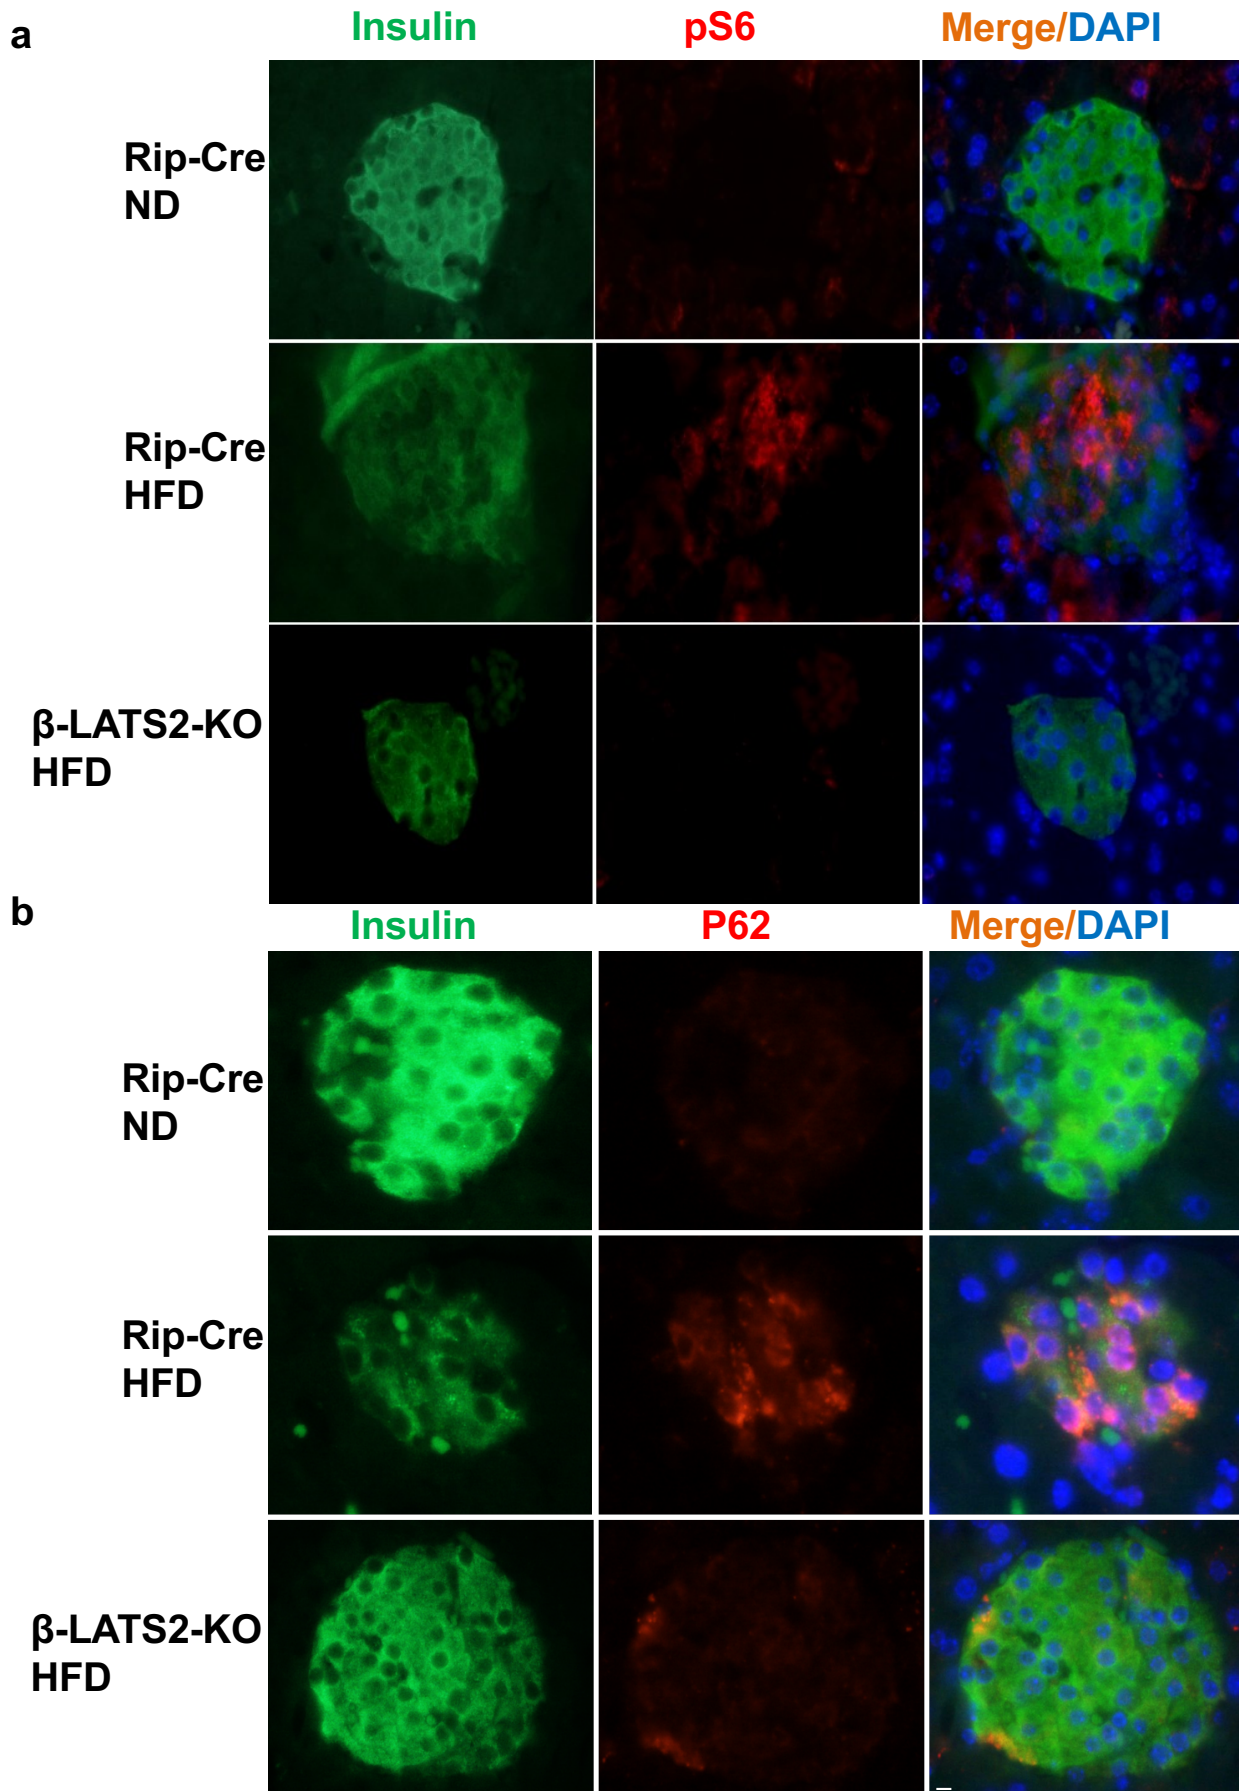

**Supplementary Figure 7. LATS2 regulates mTORC1 and autophagy in HFD induced diabetic mice.** Representative triple-stainings for phospho-S6 (pS6; red, a), or p62 (red, b), insulin (green) and DAPI (blue) are shown from pancreatic sections obtained from  $\beta$ -LATS2<sup>-/-</sup> and Rip-Cre control mice fed a normal (ND) or high fat/ high sucrose diet (“Surwit”; HFD) for 17 weeks. Scale bar depicts 10 $\mu$ m.



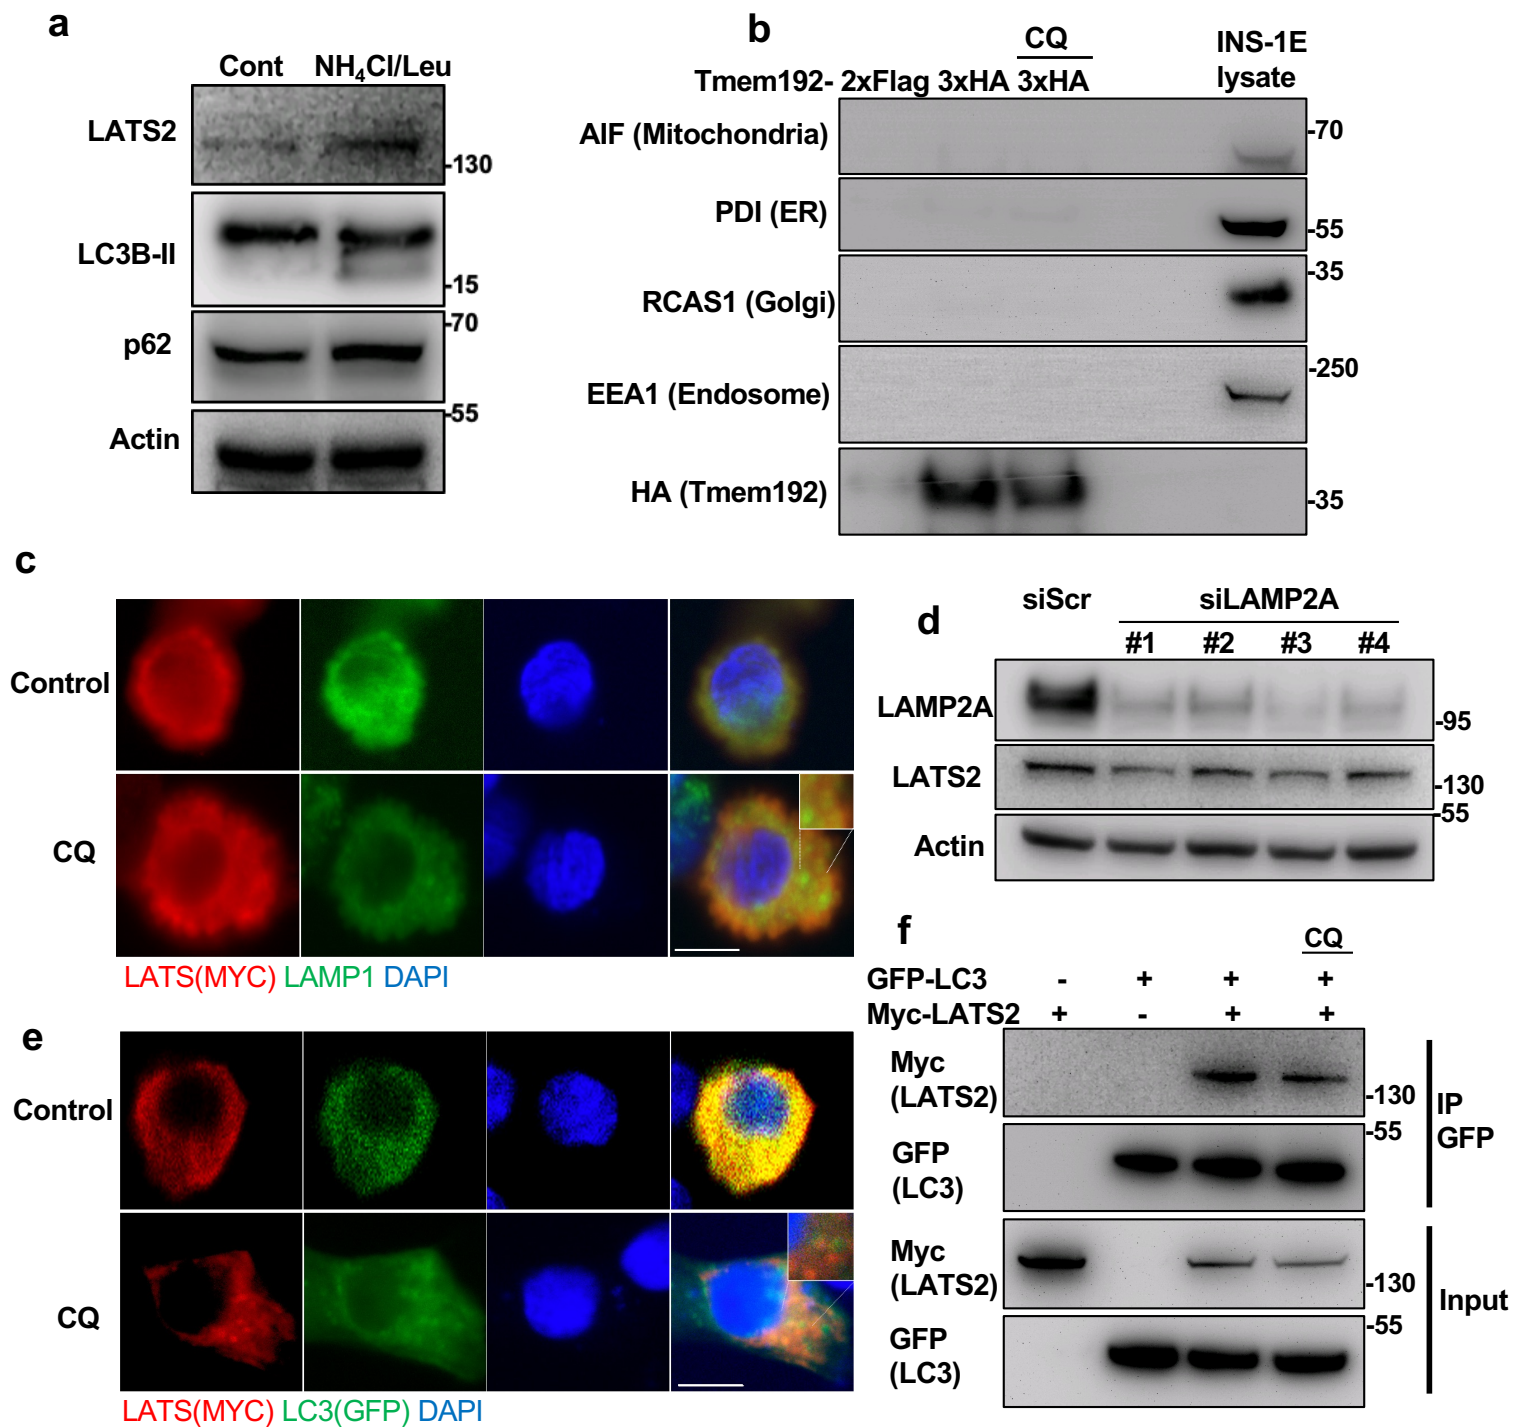

**Supplementary Figure 8. LATS2-autophagy crosstalk.** (a) Representative Western blot of INS-1E cells treated with a cocktail of 100  $\mu$ M Leupeptin and 10 mM  $\text{NH}_4\text{Cl}$  for 12h. (b) INS-1E cells were co-transfected with LATS2-Myc and Tmem192-3xHA or Tmem192-2xFlag plasmids for 48h. One set of cells were treated with 50 $\mu$ M CQ for last 4h. Representative Western blot of lysosomes isolated from INS-1E cells together with INS-1E total lysate is shown. (c) Representative confocal microscopy-acquired triple-stainings for Myc-LATS2 (Myc; red) or LAMP1 (green) and DAPI (blue) are shown from human insulinoma CM  $\beta$ -cells left untreated or treated with CQ (100 $\mu$ M CQ for the last 6h). (d) Representative Western blot of INS-1E cells transfected with with siScr or LAMP2A for 72h. (e) Representative confocal microscopy-acquired triple-stainings for Myc-LATS2 (Myc; red) or LC3-GFP (GFP; green) and DAPI (blue) are shown from INS-1E cells left untreated or treated with CQ (100 $\mu$ M CQ for the last 6h). (f) INS-1E cells were transfected GFP-LC3 and /or LATS2-Myc plasmids for 48h. One set of cells were treated with 50 $\mu$ M CQ for last 4h. Representative Western blot of immunoprecipitation using anti-GFP magnetic beads is shown. Scale bar depicts 10 $\mu$ m.

**a**

| Motif | Start | End  | Pattern | PSSM Score |
|-------|-------|------|---------|------------|
| xLIR  | 666   | 671  | SMFVKI  | 12         |
| WxxL  | 80    | 85   | IRYSLL  | 4          |
| WxxL  | 181   | 186  | ASYHQL  | 7          |
| WxxL  | 214   | 219  | YLFPGV  | -3         |
| WxxL  | 284   | 289  | GGYASL  | 8          |
| WxxL  | 653   | 658  | SNYNRL  | 7          |
| WxxL  | 677   | 682  | GAFGEV  | 3          |
| WxxL  | 840   | 845  | DLWDDV  | 16         |
| WxxL  | 888   | 893  | KGYTQL  | 10         |
| WxxL  | 894   | 899  | CDWWSV  | 13         |
| WxxL  | 902   | 907  | ILFEML  | 7          |
| WxxL  | 971   | 976  | PFFSAI  | 3          |
| WxxL  | 1000  | 1005 | SNFDPV  | 10         |
| WxxL  | 1020  | 1025 | KAWDTL  | 16         |

**b**

```

>NP_055387.2 serine/threonine-protein kinase LATS2 [Homo sapiens]
MRPKTFPATTYSGNSRQRLQEIREGLKQPSKSSVQGLPAGPNSDTSLDKVLGSKDATRQQQOMRATPKF
GPYQKALREIRYSLLPFANESGTSAAAENVNRQMLQELVNAGCDQEMAGRALKQTGSRSEIAALEYISKMG
YLDPRNEQIVRVIKQTS PGKGLMPTPVTRRPSFEGTGDSFASYHQLSGTPYEGPSFGADGPTALEEMPRP
YVDYLFPGV GPHGPGHQHQHPPKGYGASVEAAGAHFPLQGAHYGRPHLLVPGPELGYGVQRSPSFQSKTP
PETGGYASL PTKGQGPPGAGLAFPPPAAGLYVPHPHHKQAGPAAHQHLVLSRSQVFASDSPQSLLTP
SRNSLNVLDLYELGSTSVQQWPAATLARRDSLQKPGLEAPPRAHVAFRPDCPVPSRTNSFNHQPRPGPPG
KAEPSPAPNTVTAVTAAHILHPVKSVRVL RPEPQTAVGSPHPAWVPAPAPAPAPAPAPAAEGLDAKEEH
ALALGGAGAFPLDVEYGGPDRRCPPPPYPKHL LRSKSEQYDLDSL CAGMEQSLRAGPNEPEGGDKSRKS
AKGDKGGKDKKQIQ TSPVPVRKNSRDEEKRESRIKSYSPYAFKFFMEQHVENVIKTYQQKVNRR LQLEQE
MAKAGLCEAEQE QMRKI LYQKE SNYNRL KRAKMDK SMFVKI KTLGI GAFGEV CLACKVDTHALYAMKTLR
KKDVLNRNQVAHVKAERDILAEADNEWVKLYYSFQDKDSL YFVMDY I PGGDMSLLIRMEVFPEHLARF
YIAELTLAIESVHKMGFIHRDIKPDN ILIDL DGHIKLTD FGLCTGFRWTHNSKYYQKGS HVRQDSMEPSD
LWDDVSNCR CGDRLK TLEQRARKQHQRCLAHSLVGT PNYIAPEVLLR KGYTQLCDWWSVGV ILFEMLVGQ
PPFLAPTPTETQLKVINWENTLHI PAQVKLSPEARDLITK LCCSADHRLGRNGADDLKAHPFFSAIDFSS
DIRKQPAPYVPTISHPMDT SNFDPV DEESPWNDASEGST KAWDTL TSPNNKHPEHAFYEFTFRRFDDNG
YPFRCPKPSGAEASQAESSDLESSDLVDQTEGCQPVYV

```

**Supplementary Figure 9. Identification of LIR motifs in human LATS2 protein sequence.** (a) Screenshot of sequences, position and PSSM scores of the several putative LIR and xLIR motifs for human LATS2 protein obtained from the iLIR database (<https://ilir.warwick.ac.uk>). (b) xLIR (green) and LIR (yellow) motifs are highlighted in FASTA sequence of human LATS2 protein.
